# Supplementary material for: Cellular birthdate predicts laminar and regional cholinergic projection topography in the forebrain
Source: eLife. 2020 Dec 23;9:e63249. doi: 10.7554/eLife.63249 (PMC7758062; doi:10.7554/eLife.63249)
Supplement: Supplementary file 1. [file elife-63249-supp1.xlsx]

## Sheet: CAV-Cre Soma locations
Compare each cell mean with the other cell mean in that column
Number of families	1
Number of comparisons per family	3
Alpha	0.05
Sidak's multiple comparisons test	Mean Diff.	95.00% CI of diff.	Significant?	Summary	Adjusted P Value
Superficial - Deep
Bregma +0.5 to +1.25	-0.005556	-0.6053 to 0.5941	No	ns	>0.9999
Bregma -0.5 to +0.5	0.4972	0.01054 to 0.9839	Yes	*	0.0466
Bregma -2.0 to -0.5	-0.4917	-1.253 to 0.2696	No	ns	0.179
Test details	Mean 1	Mean 2	Mean Diff.	SE of diff.	N1	N2	t	DF
Superficial - Deep
Bregma +0.5 to +1.25	0.09444	0.1	-0.005556	0.1522	6	5	0.0365	4
Bregma -0.5 to +0.5	0.6139	0.1167	0.4972	0.1235	6	5	4.026	4
Bregma -2.0 to -0.5	0.2917	0.7833	-0.4917	0.1932	6	5	2.545	4

## Sheet: bithdate-SS Ctx overall proj
Number of families	1
Number of comparisons per family	6
Alpha	0.05
Tukey's multiple comparisons test	Mean Diff.	95.00% CI of diff.	Significant?	Summary	Adjusted P Value
E10.5 vs. E11.5	0.143	-0.02609 to 0.3120	No	ns	0.1099	A-B
E10.5 vs. E12.5	0.2613	0.09220 to 0.4303	Yes	**	0.0027	A-C
E10.5 vs. E13.5	0.3335	0.1411 to 0.5260	Yes	**	0.001	A-D
E11.5 vs. E12.5	0.1183	-0.04110 to 0.2777	No	ns	0.1806	B-C
E11.5 vs. E13.5	0.1906	0.006529 to 0.3746	Yes	*	0.0415	B-D
E12.5 vs. E13.5	0.07229	-0.1118 to 0.2563	No	ns	0.6651	C-D
Test details	Mean 1	Mean 2	Mean Diff.	SE of diff.	n1	n2	q	DF
E10.5 vs. E11.5	0.3396	0.1966	0.143	0.0576	4	5	3.51	13
E10.5 vs. E12.5	0.3396	0.07832	0.2613	0.0576	4	5	6.415	13
E10.5 vs. E13.5	0.3396	0.006031	0.3335	0.06558	4	3	7.193	13
E11.5 vs. E12.5	0.1966	0.07832	0.1183	0.0543	5	5	3.081	13
E11.5 vs. E13.5	0.1966	0.006031	0.1906	0.0627	5	3	4.298	13
E12.5 vs. E13.5	0.07832	0.006031	0.07229	0.0627	5	3	1.63	13

## Sheet: birthdate-SS Ctx layer proj
Within each column, compare rows (simple effects within columns)
Number of families	3
Number of comparisons per family	3
Alpha	0.05
Tukey's multiple comparisons test	Mean Diff.	95.00% CI of diff.	Significant?	Summary	Adjusted P Value
L1
E10.5 vs. E11.5	-0.05406	-0.1431 to 0.03503	No	ns	0.1632
E10.5 vs. E12.5	-0.8121	-1.120 to -0.5046	Yes	**	0.0033
E11.5 vs. E12.5	-0.758	-0.9177 to -0.5984	Yes	***	0.0002
L2-4
E10.5 vs. E11.5	-0.3065	-0.6032 to -0.009676	Yes	*	0.046
E10.5 vs. E12.5	0.05242	-0.1855 to 0.2904	No	ns	0.6664
E11.5 vs. E12.5	0.3589	0.05221 to 0.6655	Yes	*	0.0302
L5-6
E10.5 vs. E11.5	0.3436	0.1106 to 0.5765	Yes	*	0.0175
E10.5 vs. E12.5	0.7515	0.4071 to 1.096	Yes	**	0.0057
E11.5 vs. E12.5	0.4079	0.02309 to 0.7928	Yes	*	0.0416
Test details	Mean 1	Mean 2	Mean Diff.	SE of diff.	N1	N2	q	DF
L1
E10.5 vs. E11.5	0.01117	0.06523	-0.05406	0.02132	4	5	3.586	3
E10.5 vs. E12.5	0.01117	0.8233	-0.8121	0.0736	4	5	15.6	3
E11.5 vs. E12.5	0.06523	0.8233	-0.758	0.0448	5	5	23.93	4
L2-4
E10.5 vs. E11.5	0.1375	0.444	-0.3065	0.07102	4	5	6.102	3
E10.5 vs. E12.5	0.1375	0.08512	0.05242	0.05694	4	5	1.302	3
E11.5 vs. E12.5	0.444	0.08512	0.3589	0.08604	5	5	5.898	4
L5-6
E10.5 vs. E11.5	0.8454	0.5019	0.3436	0.05575	4	5	8.715	3
E10.5 vs. E12.5	0.8454	0.09392	0.7515	0.08243	4	5	12.89	3
E11.5 vs. E12.5	0.5019	0.09392	0.4079	0.108	5	5	5.343	4

## Sheet: birthdate-hippo proj
Number of families	1
Number of comparisons per family	6
Alpha	0.05
Tukey's multiple comparisons test	Mean Diff.	95.00% CI of diff.	Significant?	Summary	Adjusted P Value
E10.5 vs. E11.5	-0.1756	-0.3852 to 0.03402	No	ns	0.1157	A-B
E10.5 vs. E12.5	-0.4478	-0.6459 to -0.2498	Yes	****	<0.0001	A-C
E10.5 vs. E13.5	-0.3728	-0.6071 to -0.1384	Yes	**	0.002	A-D
E11.5 vs. E12.5	-0.2722	-0.4403 to -0.1042	Yes	**	0.0017	B-C
E11.5 vs. E13.5	-0.1972	-0.4068 to 0.01244	No	ns	0.0684	B-D
E12.5 vs. E13.5	0.07507	-0.1230 to 0.2731	No	ns	0.6944	C-D
Test details	Mean 1	Mean 2	Mean Diff.	SE of diff.	n1	n2	q	DF
E10.5 vs. E11.5	0.02592	0.2015	-0.1756	0.07212	3	5	3.443	14
E10.5 vs. E12.5	0.02592	0.4737	-0.4478	0.06814	3	7	9.294	14
E10.5 vs. E13.5	0.02592	0.3987	-0.3728	0.08063	3	3	6.538	14
E11.5 vs. E12.5	0.2015	0.4737	-0.2722	0.05782	5	7	6.658	14
E11.5 vs. E13.5	0.2015	0.3987	-0.1972	0.07212	5	3	3.867	14
E12.5 vs. E13.5	0.4737	0.3987	0.07507	0.06814	7	3	1.558	14

## Sheet: birthdate-BLA proj
Number of families	1
Number of comparisons per family	6
Alpha	0.05
Tukey's multiple comparisons test	Mean Diff.	95.00% CI of diff.	Significant?	Summary	Adjusted P Value
E10.5 vs. E11.5	-1.577	-3.383 to 0.2288	No	ns	0.0967	A-B
E10.5 vs. E12.5	-1.754	-3.355 to -0.1534	Yes	*	0.0298	A-C
E10.5 vs. E13.5	0.5764	-1.354 to 2.507	No	ns	0.8211	A-D
E11.5 vs. E12.5	-0.1771	-1.625 to 1.271	No	ns	0.984	B-C
E11.5 vs. E13.5	2.153	0.3476 to 3.959	Yes	*	0.0176	B-D
E12.5 vs. E13.5	2.33	0.7298 to 3.931	Yes	**	0.0041	C-D
Test details	Mean 1	Mean 2	Mean Diff.	SE of diff.	n1	n2	q	DF
E10.5 vs. E11.5	0.6651	2.242	-1.577	0.6213	3	4	3.59	14
E10.5 vs. E12.5	0.6651	2.419	-1.754	0.5507	3	8	4.504	14
E10.5 vs. E13.5	0.6651	0.08865	0.5764	0.6642	3	3	1.227	14
E11.5 vs. E12.5	2.242	2.419	-0.1771	0.4981	4	8	0.5028	14
E11.5 vs. E13.5	2.242	0.08865	2.153	0.6213	4	3	4.902	14
E12.5 vs. E13.5	2.419	0.08865	2.33	0.5507	8	3	5.985	14

## Sheet: birthate-Tm-soma locations
Within each column, compare rows (simple effects within columns)
Number of families	3
Number of comparisons per family	6
Alpha	0.05
Tukey's multiple comparisons test	Mean Diff.	95.00% CI of diff.	Significant?	Summary	Adjusted P Value
Bregma +0.5 to +1.25
E10 vs. E11	0.03867	-1.194 to 1.272	No	ns	0.9953
E10 vs. E12	-0.2283	-1.014 to 0.5576	No	ns	0.4027
E10 vs. E13	-0.5333	-1.911 to 0.8445	No	ns	0.2682
E11 vs. E12	-0.267	-0.8748 to 0.3408	No	ns	0.394
E11 vs. E13	-0.572	-0.7163 to -0.4277	Yes	**	0.0025
E12 vs. E13	-0.305	-1.975 to 1.365	No	ns	0.655
Bregma -0.5 to +0.5
E10 vs. E11	0.02467	-1.662 to 1.711	No	ns	0.9995
E10 vs. E12	0.07917	-1.162 to 1.320	No	ns	0.9653
E10 vs. E13	0.2	-2.375 to 2.775	No	ns	0.942
E11 vs. E12	0.0545	-0.3578 to 0.4668	No	ns	0.9451
E11 vs. E13	0.1753	-0.9401 to 1.291	No	ns	0.7298
E12 vs. E13	0.1208	-0.7812 to 1.023	No	ns	0.799
Bregma -2.0 to -0.5
E10 vs. E11	-0.06	-0.7765 to 0.6565	No	ns	0.9299
E10 vs. E12	0.1513	-1.587 to 1.890	No	ns	0.9229
E10 vs. E13	0.34	-0.8767 to 1.557	No	ns	0.4231
E11 vs. E12	0.2113	-0.4167 to 0.8392	No	ns	0.5742
E11 vs. E13	0.4	-0.6127 to 1.413	No	ns	0.26
E12 vs. E13	0.1888	-0.6867 to 1.064	No	ns	0.5652
Test details	Mean 1	Mean 2	Mean Diff.	SE of diff.	N1	N2	q	DF
Bregma +0.5 to +1.25
E10 vs. E11	0.2167	0.178	0.03867	0.178	3	5	0.3073	2
E10 vs. E12	0.2167	0.445	-0.2283	0.1134	3	8	2.847	2
E10 vs. E13	0.2167	0.75	-0.5333	0.1989	3	3	3.793	2
E11 vs. E12	0.178	0.445	-0.267	0.1493	5	8	2.529	4
E11 vs. E13	0.178	0.75	-0.572	0.02082	5	3	38.85	2
E12 vs. E13	0.445	0.75	-0.305	0.241	8	3	1.79	2
Bregma -0.5 to +0.5
E10 vs. E11	0.3767	0.352	0.02467	0.2434	3	5	0.1433	2
E10 vs. E12	0.3767	0.2975	0.07917	0.1791	3	8	0.6252	2
E10 vs. E13	0.3767	0.1767	0.2	0.3716	3	3	0.7611	2
E11 vs. E12	0.352	0.2975	0.0545	0.1013	5	8	0.7611	4
E11 vs. E13	0.352	0.1767	0.1753	0.161	5	3	1.54	2
E12 vs. E13	0.2975	0.1767	0.1208	0.1302	8	3	1.313	2
Bregma -2.0 to -0.5
E10 vs. E11	0.41	0.47	-0.06	0.1034	3	5	0.8206	2
E10 vs. E12	0.41	0.2588	0.1513	0.2509	3	8	0.8526	2
E10 vs. E13	0.41	0.07	0.34	0.1756	3	3	2.738	2
E11 vs. E12	0.47	0.2588	0.2113	0.1543	5	8	1.937	4
E11 vs. E13	0.47	0.07	0.4	0.1462	5	3	3.871	2
E12 vs. E13	0.2588	0.07	0.1888	0.1263	8	3	2.113	2

## Sheet: birthate-EdU-soma locations
Within each column, compare rows (simple effects within columns)
Number of families	4
Number of comparisons per family	6
Alpha	0.05
Tukey's multiple comparisons test	Mean Diff.	95.00% CI of diff.	Significant?	Summary	Adjusted P Value
Bregma +1.25 to +1.75
E10 vs. E11	0	-0.3499 to 0.3499	No	ns	>0.9999
E10 vs. E12	-0.17	-0.5199 to 0.1799	No	ns	0.5718
E10 vs. E13	-0.13	-0.4799 to 0.2199	No	ns	0.7565
E11 vs. E12	-0.17	-0.5199 to 0.1799	No	ns	0.5718
E11 vs. E13	-0.13	-0.4799 to 0.2199	No	ns	0.7565
E12 vs. E13	0.04	-0.3099 to 0.3899	No	ns	0.9901
Bregma +0.5 to +1.25
E10 vs. E11	-0.04	-0.3899 to 0.3099	No	ns	0.9901
E10 vs. E12	-0.18	-0.5299 to 0.1699	No	ns	0.5246
E10 vs. E13	-0.4	-0.7499 to -0.05008	Yes	*	0.0192
E11 vs. E12	-0.14	-0.4899 to 0.2099	No	ns	0.7123
E11 vs. E13	-0.36	-0.7099 to -0.01008	Yes	*	0.0416
E12 vs. E13	-0.22	-0.5699 to 0.1299	No	ns	0.3488
Bregma -0.5 to +0.5
E10 vs. E11	-0.27	-0.6199 to 0.07992	No	ns	0.1832
E10 vs. E12	-0.13	-0.4799 to 0.2199	No	ns	0.7565
E10 vs. E13	-0.06	-0.4099 to 0.2899	No	ns	0.9681
E11 vs. E12	0.14	-0.2099 to 0.4899	No	ns	0.7123
E11 vs. E13	0.21	-0.1399 to 0.5599	No	ns	0.3899
E12 vs. E13	0.07	-0.2799 to 0.4199	No	ns	0.9508
Bregma -2.0 to -0.5
E10 vs. E11	0.31	-0.03992 to 0.6599	No	ns	0.0994
E10 vs. E12	0.48	0.1301 to 0.8299	Yes	**	0.0035
E10 vs. E13	0.59	0.2401 to 0.9399	Yes	***	0.0003
E11 vs. E12	0.17	-0.1799 to 0.5199	No	ns	0.5718
E11 vs. E13	0.28	-0.06992 to 0.6299	No	ns	0.1584
E12 vs. E13	0.11	-0.2399 to 0.4599	No	ns	0.8368
Test details	Mean 1	Mean 2	Mean Diff.	SE of diff.	N1	N2	q	DF
Bregma +1.25 to +1.75
E10 vs. E11	0	0	0	0.1315	4	4	0	48
E10 vs. E12	0	0.17	-0.17	0.1315	4	4	1.829	48
E10 vs. E13	0	0.13	-0.13	0.1315	4	4	1.398	48
E11 vs. E12	0	0.17	-0.17	0.1315	4	4	1.829	48
E11 vs. E13	0	0.13	-0.13	0.1315	4	4	1.398	48
E12 vs. E13	0.17	0.13	0.04	0.1315	4	4	0.4302	48
Bregma +0.5 to +1.25
E10 vs. E11	0.04	0.08	-0.04	0.1315	4	4	0.4302	48
E10 vs. E12	0.04	0.22	-0.18	0.1315	4	4	1.936	48
E10 vs. E13	0.04	0.44	-0.4	0.1315	4	4	4.302	48
E11 vs. E12	0.08	0.22	-0.14	0.1315	4	4	1.506	48
E11 vs. E13	0.08	0.44	-0.36	0.1315	4	4	3.872	48
E12 vs. E13	0.22	0.44	-0.22	0.1315	4	4	2.366	48
Bregma -0.5 to +0.5
E10 vs. E11	0.13	0.4	-0.27	0.1315	4	4	2.904	48
E10 vs. E12	0.13	0.26	-0.13	0.1315	4	4	1.398	48
E10 vs. E13	0.13	0.19	-0.06	0.1315	4	4	0.6454	48
E11 vs. E12	0.4	0.26	0.14	0.1315	4	4	1.506	48
E11 vs. E13	0.4	0.19	0.21	0.1315	4	4	2.259	48
E12 vs. E13	0.26	0.19	0.07	0.1315	4	4	0.7529	48
Bregma -2.0 to -0.5
E10 vs. E11	0.83	0.52	0.31	0.1315	4	4	3.334	48
E10 vs. E12	0.83	0.35	0.48	0.1315	4	4	5.163	48
E10 vs. E13	0.83	0.24	0.59	0.1315	4	4	6.346	48
E11 vs. E12	0.52	0.35	0.17	0.1315	4	4	1.829	48
E11 vs. E13	0.52	0.24	0.28	0.1315	4	4	3.012	48
E12 vs. E13	0.35	0.24	0.11	0.1315	4	4	1.183	48

## Sheet: birthdate-amygdala regions proj
Within each column, compare rows (simple effects within columns)
Number of families	2
Number of comparisons per family	6
Alpha	0.05
Tukey's multiple comparisons test	Predicted (LS) mean diff.	95.00% CI of diff.	Significant?	Summary	Adjusted P Value
BLA
E10.5 vs. E11.5	-0.8212	-0.9599 to -0.6824	Yes	****	<0.0001
E10.5 vs. E12.5	-0.8556	-0.9728 to -0.7383	Yes	****	<0.0001
E10.5 vs. E13.5	-0.8556	-0.9943 to -0.7168	Yes	****	<0.0001
E11.5 vs. E12.5	-0.03438	-0.1517 to 0.08290	No	ns	0.8508
E11.5 vs. E13.5	-0.03438	-0.1732 to 0.1044	No	ns	0.9031
E12.5 vs. E13.5	0	-0.1173 to 0.1173	No	ns	>0.9999
CeA
E10.5 vs. E11.5	0.8212	0.6824 to 0.9599	Yes	****	<0.0001
E10.5 vs. E12.5	0.8556	0.7405 to 0.9706	Yes	****	<0.0001
E10.5 vs. E13.5	0.8556	0.7168 to 0.9943	Yes	****	<0.0001
E11.5 vs. E12.5	0.03438	-0.08068 to 0.1494	No	ns	0.8435
E11.5 vs. E13.5	0.03438	-0.1044 to 0.1732	No	ns	0.9031
E12.5 vs. E13.5	0	-0.1151 to 0.1151	No	ns	>0.9999
Test details	Predicted (LS) mean 1	Predicted (LS) mean 2	Predicted (LS) mean diff.	SE of diff.	N1	N2	q	DF
BLA
E10.5 vs. E11.5	0.1444	0.9656	-0.8212	0.05045	3	3	23.02	25
E10.5 vs. E12.5	0.1444	1	-0.8556	0.04264	3	7	28.38	25
E10.5 vs. E13.5	0.1444	1	-0.8556	0.05045	3	3	23.98	25
E11.5 vs. E12.5	0.9656	1	-0.03438	0.04264	3	7	1.14	25
E11.5 vs. E13.5	0.9656	1	-0.03438	0.05045	3	3	0.9639	25
E12.5 vs. E13.5	1	1	0	0.04264	7	3	0	25
CeA
E10.5 vs. E11.5	0.8556	0.03438	0.8212	0.05045	3	3	23.02	25
E10.5 vs. E12.5	0.8556	0	0.8556	0.04183	3	8	28.93	25
E10.5 vs. E13.5	0.8556	0	0.8556	0.05045	3	3	23.98	25
E11.5 vs. E12.5	0.03438	0	0.03438	0.04183	3	8	1.162	25
E11.5 vs. E13.5	0.03438	0	0.03438	0.05045	3	3	0.9639	25
E12.5 vs. E13.5	0	0	0	0.04183	8	3	0	25

## Sheet: birthdate-mPFC proj
Number of families	1
Number of comparisons per family	6
Alpha	0.05
Tukey's multiple comparisons test	Mean Diff.	95.00% CI of diff.	Significant?	Summary	Adjusted P Value
E10.5 vs. E11.5	0.03961	-0.2090 to 0.2882	No	ns	0.9621	A-B
E10.5 vs. E12.5	-0.2357	-0.4957 to 0.02431	No	ns	0.0795	A-C
E10.5 vs. E13.5	-0.1821	-0.4601 to 0.09582	No	ns	0.2554	A-D
E11.5 vs. E12.5	-0.2753	-0.5037 to -0.04694	Yes	*	0.0178	B-C
E11.5 vs. E13.5	-0.2217	-0.4704 to 0.02686	No	ns	0.0854	B-D
E12.5 vs. E13.5	0.05356	-0.2064 to 0.3136	No	ns	0.9235	C-D
Test details	Mean 1	Mean 2	Mean Diff.	SE of diff.	n1	n2	q	DF
E10.5 vs. E11.5	0.1707	0.1311	0.03961	0.08261	3	5	0.6782	11
E10.5 vs. E12.5	0.1707	0.4064	-0.2357	0.08639	3	4	3.858	11
E10.5 vs. E13.5	0.1707	0.3529	-0.1821	0.09236	3	3	2.789	11
E11.5 vs. E12.5	0.1311	0.4064	-0.2753	0.07588	5	4	5.131	11
E11.5 vs. E13.5	0.1311	0.3529	-0.2217	0.08261	5	3	3.796	11
E12.5 vs. E13.5	0.4064	0.3529	0.05356	0.08639	4	3	0.8768	11

## Sheet: Lhx6-Shh-Soma Locations
Compare each cell mean with the other cell mean in that column
Number of families	1
Number of comparisons per family	3
Alpha	0.05
Sidak's multiple comparisons test	Predicted (LS) mean diff.	95.00% CI of diff.	Significant?	Summary	Adjusted P Value
Lhx6 - Shh
Bregma +0.5 to +1.25	0.2208	0.08338 to 0.3583	Yes	**	0.0018
Bregma -0.5 to +0.5	-0.1167	-0.2541 to 0.02078	No	ns	0.1089
Bregma -2.0 to -0.5	-0.1017	-0.2391 to 0.03578	No	ns	0.1842
Test details	Predicted (LS) mean 1	Predicted (LS) mean 2	Predicted (LS) mean diff.	SE of diff.	N1	N2	t	DF
Lhx6 - Shh
Bregma +0.5 to +1.25	0.5533	0.3325	0.2208	0.05119	3	4	4.314	15
Bregma -0.5 to +0.5	0.2633	0.38	-0.1167	0.05119	3	4	2.279	15
Bregma -2.0 to -0.5	0.1833	0.285	-0.1017	0.05119	3	4	1.986	15

[truncated: 7 more sheets: Lhx6-Shh-SS-Ctx-layer proj, Lhx6-Shh-all regions proj, E10 pathways, E11 pathways, E12 pathways, E13 pathways, septal lateral pathway inj]
